# Supplementary material for: Micellar catalysis of an iron(iii)-MOF: enhanced biosensing characteristics
Source: Royal Society of Chemistry journal article supplement (doi:10.1039/c9ay00399a), 2019-01-01
Supplement: c9ay00399a1.pdf [file c9ay00399a1.pdf]

## SUPPORTING INFORMATION

### **Micellar catalysis of an Iron (III)-MOF: Enhanced Biosensing Characteristics**

**Morvarid Aghayan<sup>a</sup>, Ali Mahmoudi<sup>a,\*</sup>, Samaneh Sohrabi<sup>b</sup>, Saeed  
Dehghanpour<sup>b</sup>, Khodadad Nazari<sup>c</sup>, Navid Mohammadian-Tabrizi<sup>d</sup>**

<sup>a</sup>Department of Chemistry, Faculty of Science, Islamic Azad University, North Tehran Branch,  
Tehran, Iran

<sup>b</sup>Department of Chemistry, Faculty of Science, Alzahra University, Tehran, Iran

<sup>c</sup>Research Institute of Petroleum Industry, N.I.O.C., Tehran, Iran

<sup>d</sup>Department of Chemistry, Faculty of science, University of Tehran, Tehran, Iran

\* Corresponding author email: [mahmoudiali.ac@gmail.com](mailto:mahmoudiali.ac@gmail.com)

## Peroxidase and catalase mimicking mechanism of PCN-222(Fe) as catalyst

One of the applications that emerge from previous studies on MOFs is their ability to catalyze oxidation reactions, which so far has only been imputed to the peroxidase enzymes mimics. PCN-222(Fe) with porphyrin rings that functions similar to the active site of peroxidase (horseradish peroxidase) is one of the best candidates as enzyme mimetics.

Our findings in this report, suggest a possible catalytic mechanism mediated by the PCN-222(Fe) in two simultaneous stages based on porphyrin rings. The active sites of PCN-222(Fe) react in an initial step with  $H_2O_2$  to generate free radicals to react with a hydrogen donor (ABTS) to form the  $ABTS^+$  species.

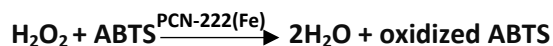

Also, kinetic rate constant ( $k_1, k_3$ ) calculations were performed to show the peroxidase-like activity of PCN-222(Fe) according to following equations(similar to HRP):

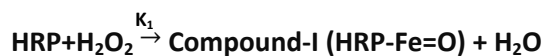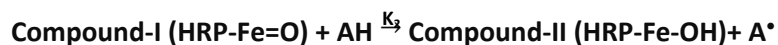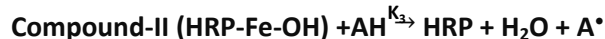

Using the peroxidase enzyme pattern, Initial reaction rate variation against catalyst concentration can be calculated as:

$$Rate = \frac{dx}{dt} = \frac{[catalyst]}{(1/k_1 [H_2O_2] + (1/k_3[S]_0))}$$

These findings (k values) are in agreement with those of HRP, that prove the sensible catalytic activity of PCN-222(Fe)(Table. S1).

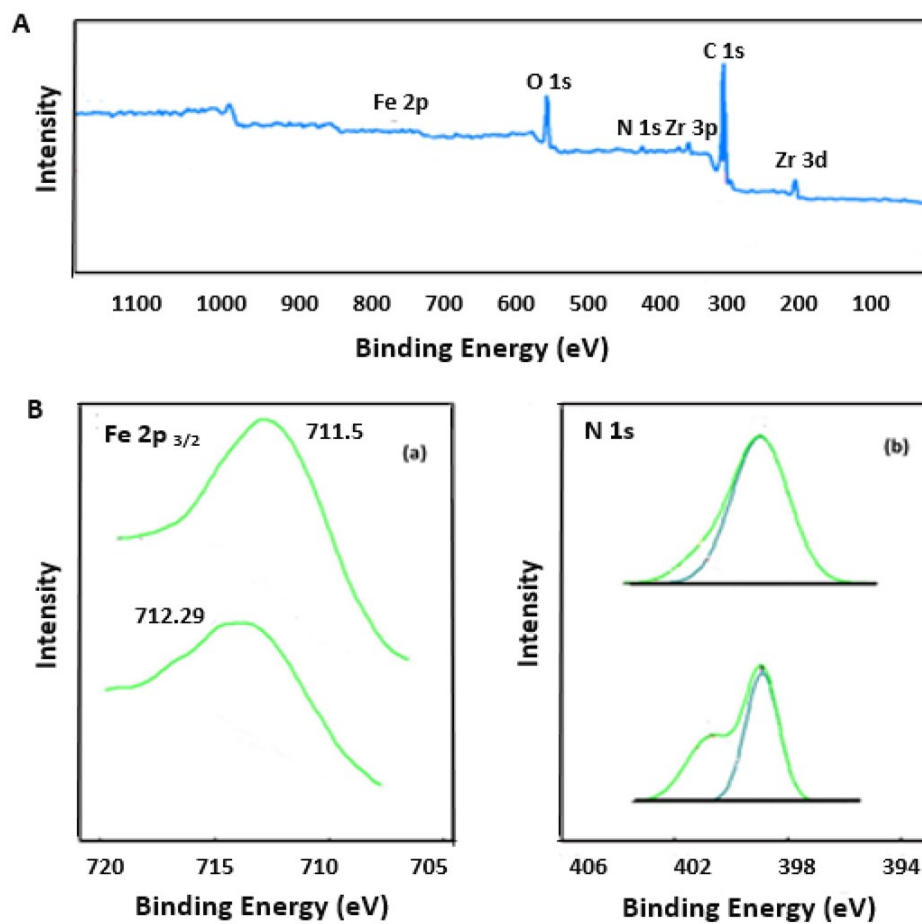

**Figure S1.** (A) XPS spectra of PCN-222 and (B) a) Fe 2p<sub>3/2</sub> core-level XPS spectra of PCN-222 (B) N 1s core-level XPS spectra of PCN-222(Fe).

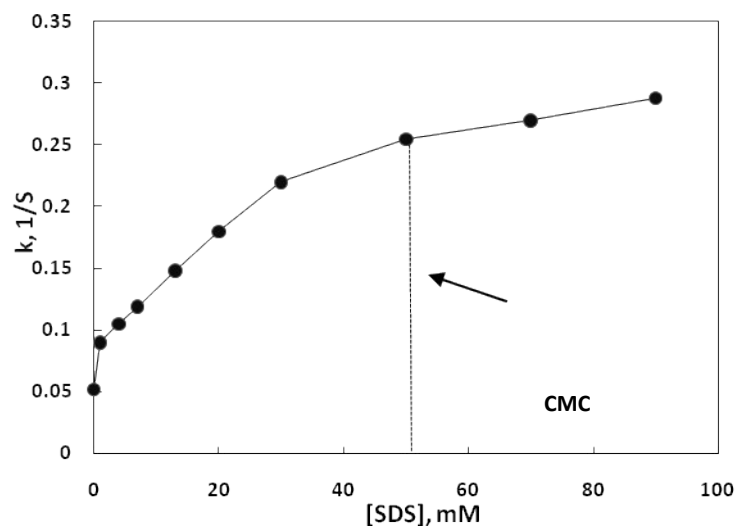

**Figure S2.** Micellization profile of PCN-222(Fe) in presence of various concentration of SDS

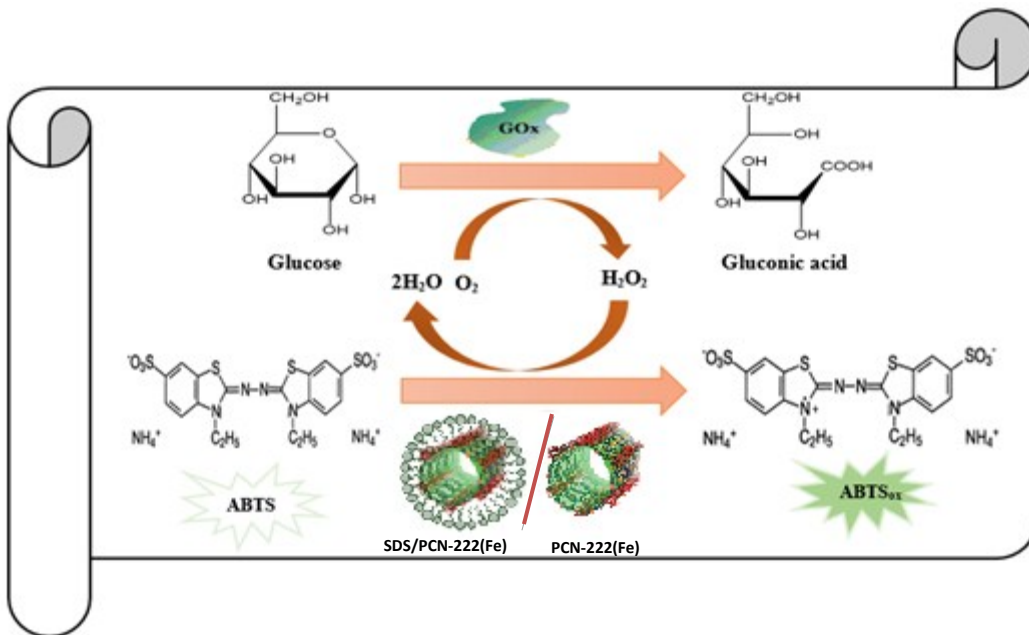

**Figure S3.** Schematic illustration of detection mechanism for glucose sensing using glucose oxidase (GOx) and PCN-222(Fe) and SDS/PCN-222(Fe) as artificial enzymes.

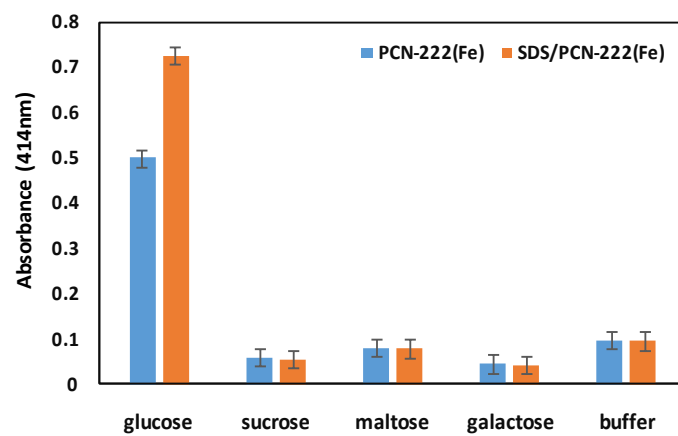

**Fig. S4.** Evaluation of Selective analysis of the glucose assay with SDS/PCN-222(Fe), PCN-222(Fe) and other control compounds.

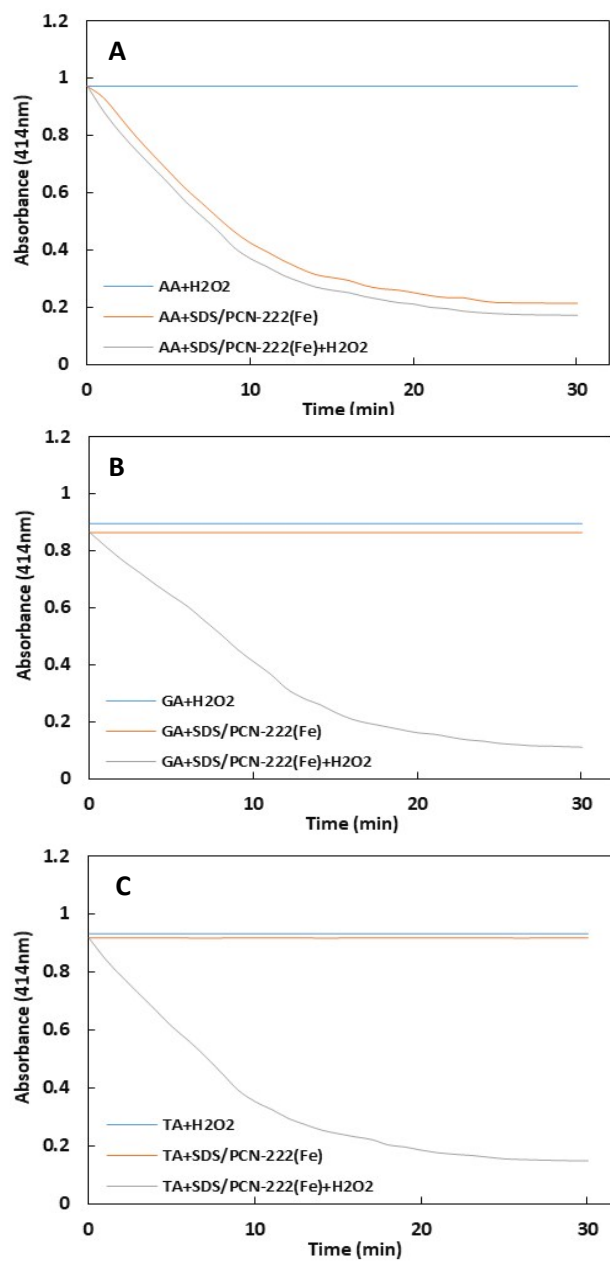

**Fig. S5.** The absorbance evolutions of AA (A) , GA (B) and TA (C) over time in the absence and presence of H<sub>2</sub>O<sub>2</sub> or SDS/PCN-222(Fe) without ABTS.

**Table. S1** Comparative rate constants value for HRP and PCN-222(Fe) catalysts

| <b>Catalyst</b> | <b><math>k_1(\text{M}^{-1}\text{s}^{-1})</math></b> | <b><math>K_3(\text{M}^{-1}\text{s}^{-1})</math></b> |
|-----------------|-----------------------------------------------------|-----------------------------------------------------|
| PCN-222(Fe)     | $6.89 \times 10^{-5}$                               | $6.03 \times 10^{-4}$                               |
| HRP             | $5.37 \times 10^{-7}$                               | $3.03 \times 10^{-5}$                               |



**Table. S2DLS and Zeta-potential Parameters for the various catalysts**

| <b>Compounds</b> | <b>diameter (nm)</b> | <b>zeta-potential (mV)</b> |
|------------------|----------------------|----------------------------|
| PCN-222(Fe)      | 73.2                 | - 0.529                    |
| SDS/PCN-222(Fe)  | 306.9                | - 24.7                     |

**Table. S3**Determination of AA in real samples

| <b>Samples</b> | <b>Detected(<math>\mu\text{M}</math>)</b> | <b>Added(<math>\mu\text{M}</math>)</b> | <b>Found(<math>\mu\text{M}</math>)</b> | <b>Recovery(%)</b> | <b>RSD(%)</b> |
|----------------|-------------------------------------------|----------------------------------------|----------------------------------------|--------------------|---------------|
| <b>1</b>       | 15.75                                     | 3                                      | 18.68                                  | 99.63              | 0.6           |
|                |                                           | 15                                     | 30.42                                  | 98.93              | 0.8           |
|                |                                           | 20                                     | 35.47                                  | 99.22              | 0.7           |
| <b>2</b>       | 16.19                                     | 3                                      | 18.91                                  | 98.54              | 2.2           |
|                |                                           | 15                                     | 30.73                                  | 98.53              | 1.3           |
|                |                                           | 20                                     | 35.78                                  | 98.87              | 1.16          |
| <b>3</b>       | 17.32                                     | 3                                      | 20.27                                  | 99.75              | 0.2           |
|                |                                           | 15                                     | 31.93                                  | 98.79              | 1.5           |
|                |                                           | 20                                     | 37.17                                  | 99.60              | 0.3           |
